# Supplementary material
Source: PubMed Central journal article supplement (PMC2812594)

**A**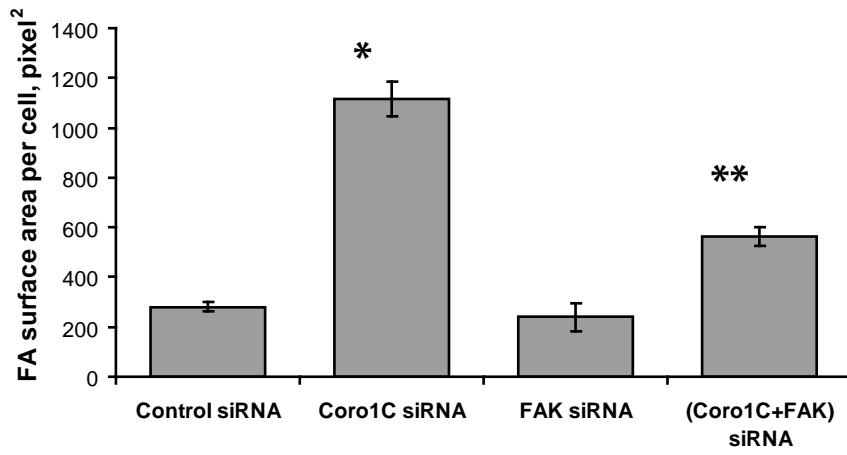**B**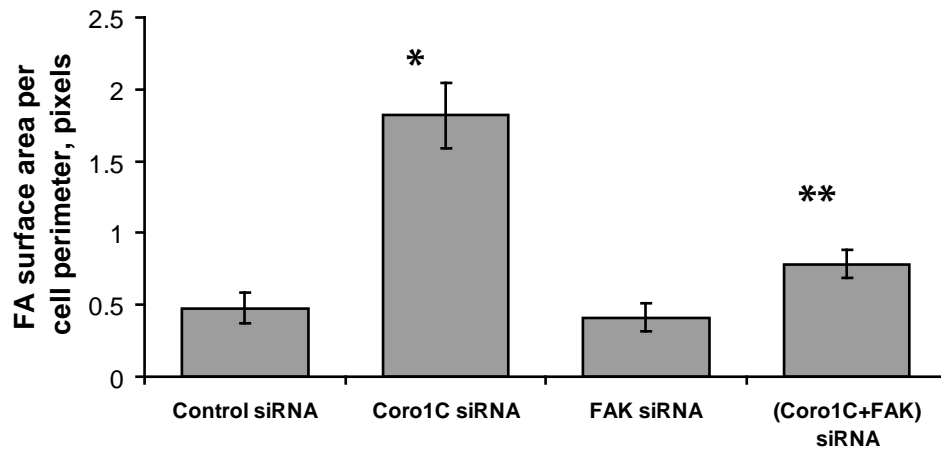

Supplement: NIHMS158941-supplement-02.pdf [file NIHMS158941-supplement-02.pdf]

**A**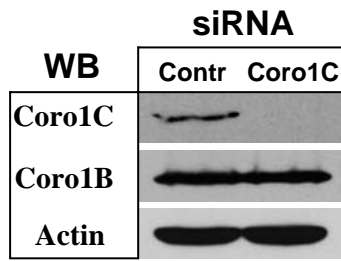**B**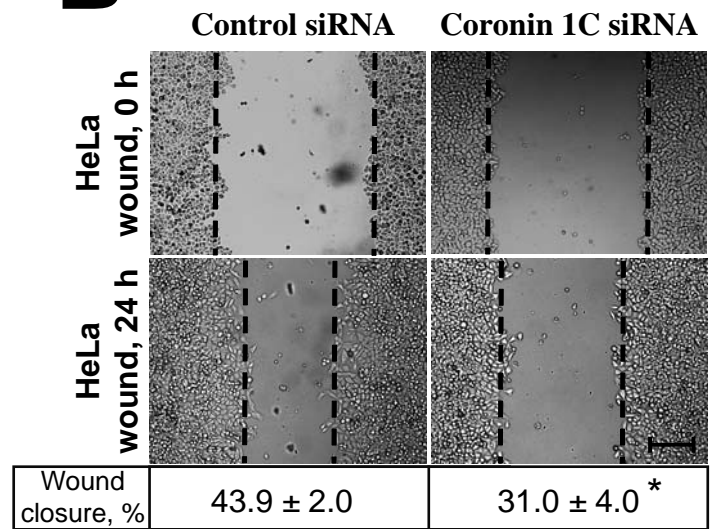**C**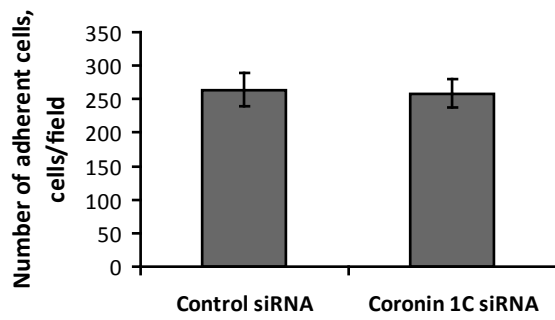**D**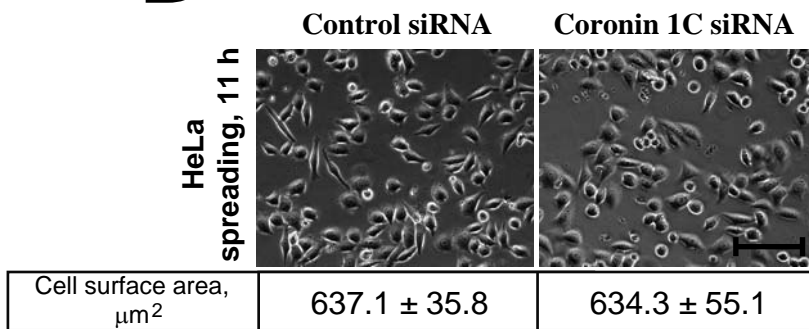

Supplement: NIHMS158941-supplement-03.pdf [file NIHMS158941-supplement-03.pdf]
